# Supplementary material for: Adolescent self-administration of the synthetic cannabinoid receptor agonist JWH-018 induces neurobiological and behavioral alterations in adult male mice
Source: Springer Nature journal article supplement (doi:10.1007/s00213-022-06191-9), 2022-08-09

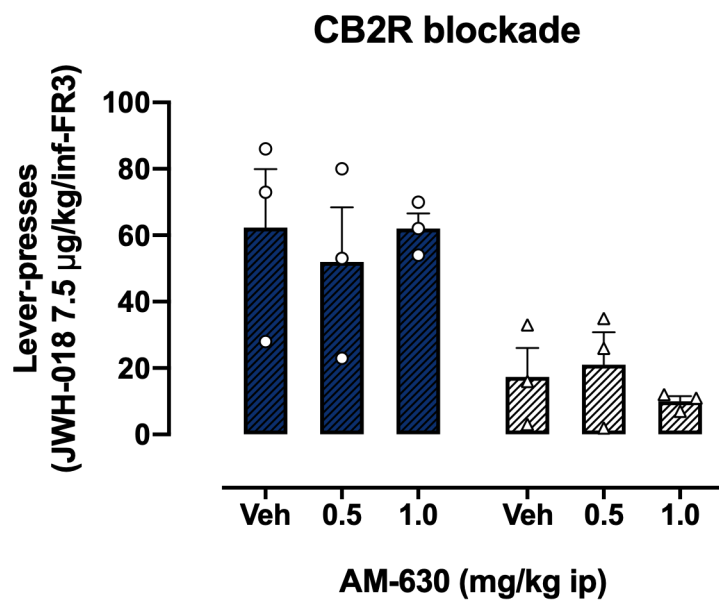

Supplement: MOESM2 [file 213_2022_6191_MOESM2_ESM.pdf]
