# Supplementary material for: Adolescent self-administration of the synthetic cannabinoid receptor agonist JWH-018 induces neurobiological and behavioral alterations in adult male mice
Source: Springer Nature journal article supplement (doi:10.1007/s00213-022-06191-9), 2022-08-09
Supplement: MOESM3 [file 213_2022_6191_MOESM3_ESM.pdf]

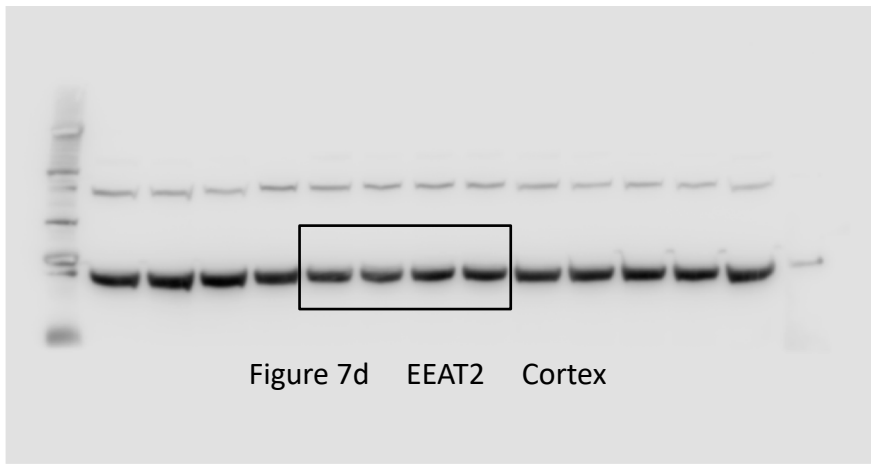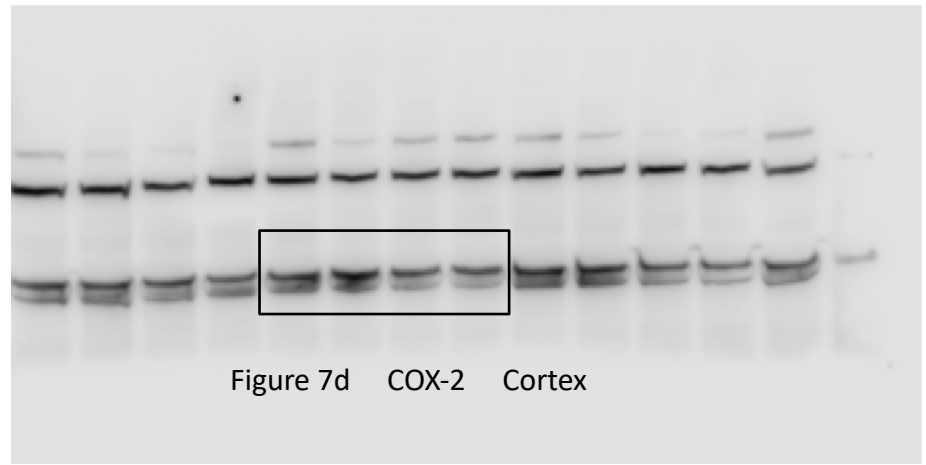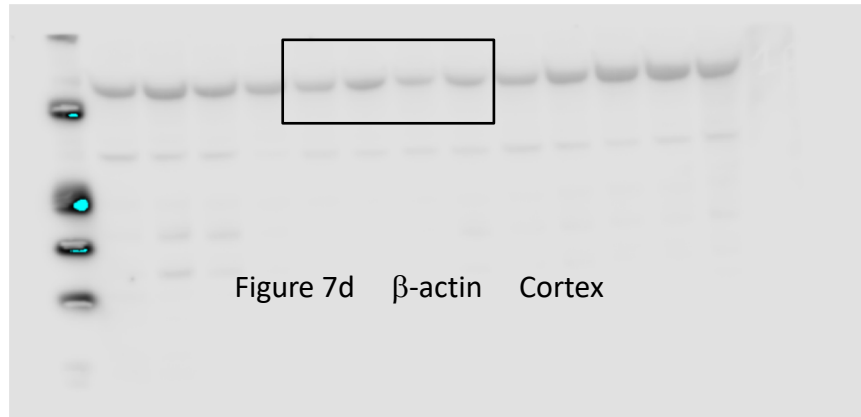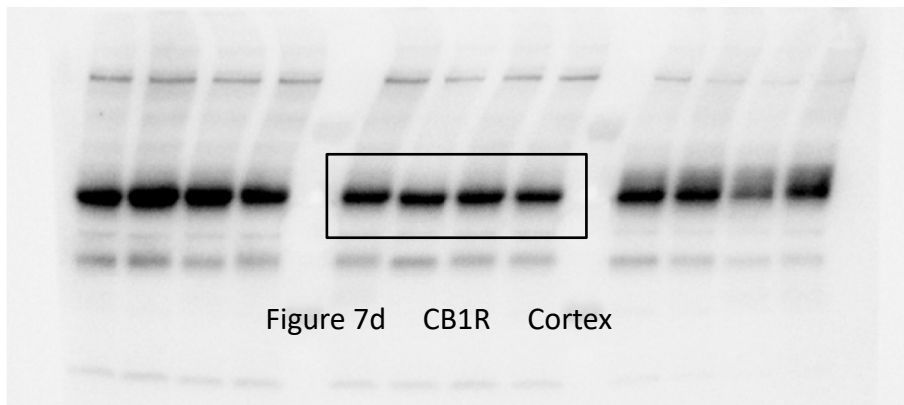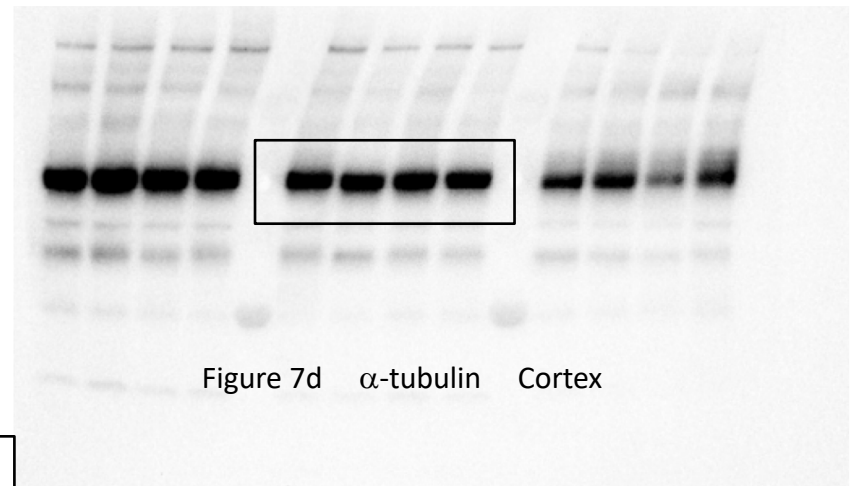

**Supplemental Figure 1.** Untruncated image of the blots shown in Fig. 7d.

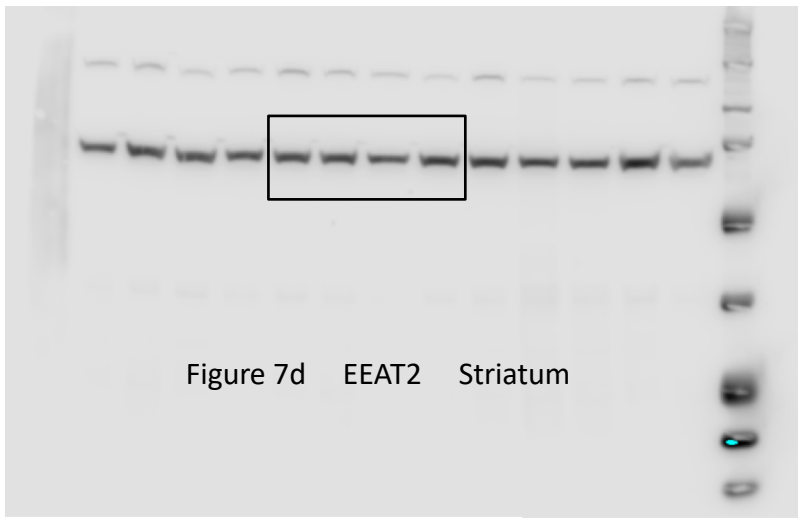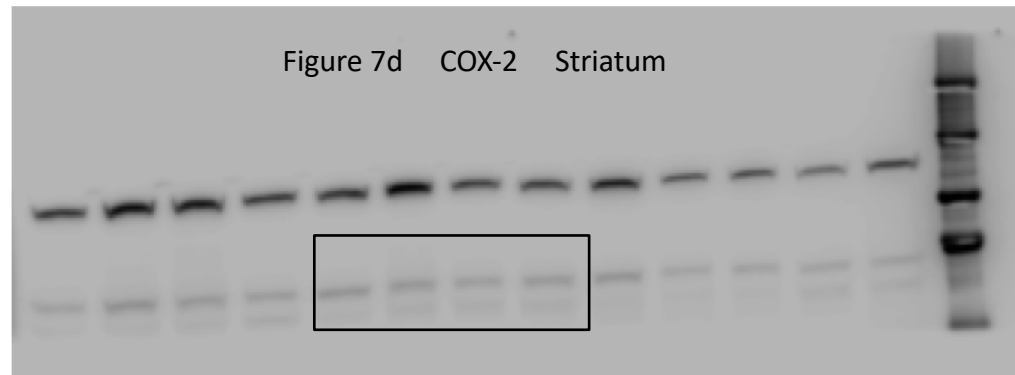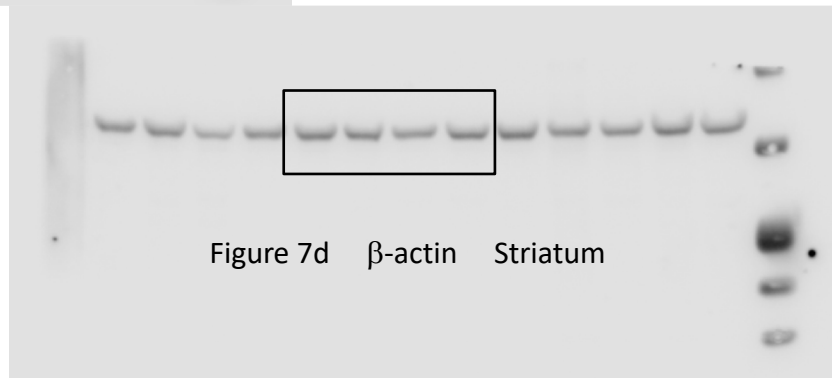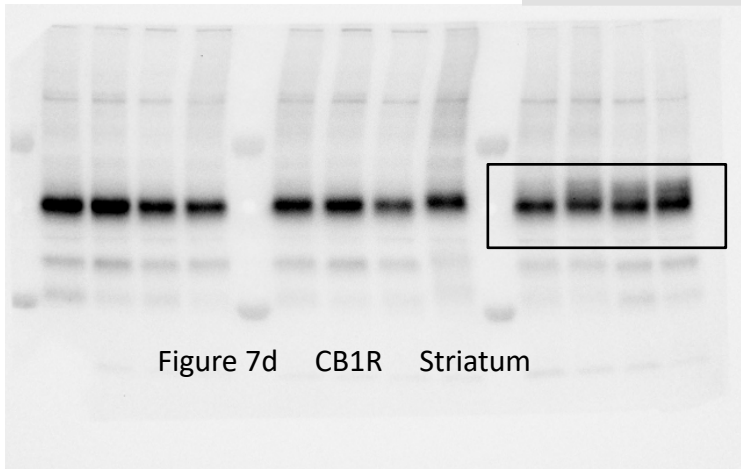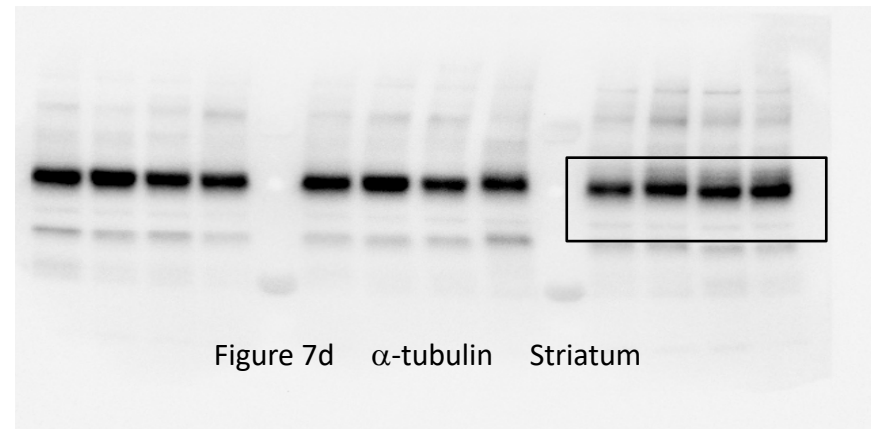

**Supplemental Figure 1.** Untruncated image of the blots shown in Fig. 7d.
